# Supplementary material
Source: HighWire-hosted journal article supplement (https://erj.ersjournals.com/content/57/2/2100092)
Supplement: inline-supplementary-material-1 [file inline-supplementary-material-1.pdf]

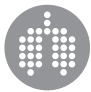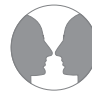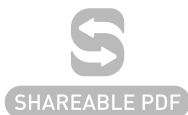

## Reply: BAL lymphocyte percentage is as good as the company it keeps

Nicola Adderley<sup>1</sup>, Christopher J. Humphreys<sup>2</sup>, Hayley Barnes <sup>3,4</sup>, Zahra A. Premji <sup>5</sup> and Kerri A. Johannson <sup>1,6</sup>

**Affiliations:** <sup>1</sup>Dept of Medicine, University of Calgary, Calgary, AB, Canada. <sup>2</sup>Dept of Medicine, University of Toronto, Toronto, ON, Canada. <sup>3</sup>Dept of Allergy, Immunology and Respiratory Medicine, Alfred Hospital, Melbourne, Australia. <sup>4</sup>Dept of Medicine, University of California, San Francisco, San Francisco, CA, USA. <sup>5</sup>Depts of Libraries and Cultural Resources, University of Calgary, Calgary, AB, Canada. <sup>6</sup>Dept of Community Health Sciences, University of Calgary, Calgary, AB, Canada.

**Correspondence:** Kerri A. Johannson, 6th floor – Pulmonary Diagnostics, 4448 Front Street S.E., Calgary, AB, Canada T3M-1M4. E-mail: kerri.johannson@ahs.ca

@ERSpublications

**No single value of BAL lymphocyte % in fibrotic hypersensitivity pneumonitis will be diagnostic for all, and it must be considered in the context of other clinical, radiological and histopathological features** <https://bit.ly/3qSwUDo>

**Cite this article as:** Adderley N, Humphreys CJ, Barnes H, *et al.* Reply: BAL lymphocyte percentage is as good as the company it keeps. *Eur Respir J* 2021; 57: 2100092 [<https://doi.org/10.1183/13993003.00092-2021>].

This single-page version can be shared freely online.

*Reply to O. Moran-Mendoza and M. Khalil:*
